# Supplementary material for: Integrated Metabolome and Transcriptome Analyses Provide New Insights into the Leaf Color Changes in Osmanthus fragrans cv. ‘Wucaigui’
Source: MDPI journal article supplement (doi:10.3390/f15040709), 2024-04-17
Supplement: s1 [file s1]

**Table S3.** Full names of hub genes.

| Number | Gene name         | Full name of gene                                     |
|--------|-------------------|-------------------------------------------------------|
| 1      | <i>OfSHOU4L1</i>  | Plasma membrane-localized proteins                    |
| 2      | <i>OfATL1B</i>    | Arabidopsis toxicos en levadura 1 B                   |
| 3      | <i>OfGABA-TP1</i> | Gamma-aminobutyric acid transaminase                  |
| 4      | <i>OfUGE5</i>     | UDP-galactose/glucose-4-epimerase 5                   |
| 5      | <i>OfANS1</i>     | 8-anilino-1-naphthalene sulfonate 1                   |
| 6      | <i>OfPPR1</i>     | Pentatricopeptide repeat 1                            |
| 7      | <i>OfUBC32</i>    | Ubiquitin-conjugating enzyme 32                       |
| 8      | <i>OfEIF1AX</i>   | Eukaryotic translation initiation factor 1A, X-linked |
| 9      | <i>OfUGE3</i>     | UDP-galactose/glucose-4-epimerase 3                   |
| 10     | <i>OfSGF29A</i>   | SaGa associated factor 29 A                           |
| 11     | <i>OfCCD1</i>     | Carotenoid cleavage dioxygenases                      |
