# Supplementary material for: Integrated Metabolome and Transcriptome Analyses Provide New Insights into the Leaf Color Changes in Osmanthus fragrans cv. ‘Wucaigui’
Source: MDPI journal article supplement (doi:10.3390/f15040709), 2024-04-17
Supplement: s1 [file s1]

**Table S1.** Principal component analysis of the six developmental stages of *O. fragrans* ‘Wucaigui’.

| Comparable group | Var ID                                       | VIP       |
|------------------|----------------------------------------------|-----------|
| S1 versus S2     | Lutein                                       | 1.49923   |
|                  | Peonidin-3-O-(6-O-p-coumaroyl)-glucoside     | 1.49616   |
|                  | Kaempferol-3-O-rutinoside                    | 1.44706   |
|                  | Pelargonidin-3-O-(6-O-p-coumaroyl)-glucoside | 1.43395   |
|                  | $\beta$ -carotene                            | 1.3974    |
|                  | Pelargonidin-3,5-O-diglucoside               | 1.36328   |
|                  | Pelargonidin-3-O-rutinoside                  | 1.2415    |
|                  | Cyanidin-3-O-glucoside                       | 1.1593    |
|                  | Cyanidin-3-O-rutinoside-5-O-glucoside        | 1.15415   |
|                  | Cyanidin-3-O-rutinoside                      | 1.15171   |
|                  | Zeaxanthin                                   | 1.05468   |
|                  | Rutin                                        | 1.0452    |
|                  | Peonidin-3-O-rutinoside                      | 0.955719  |
|                  | (E/Z)-phytoene                               | 0.787682  |
|                  | Antheraxanthin                               | 0.735274  |
|                  | Neoxanthin                                   | 0.697056  |
|                  | Quercetin-3-O-glucoside                      | 0.687318  |
|                  | $\alpha$ -cryptoxanthin                      | 0.505862  |
|                  | $\beta$ -cryptoxanthin                       | 0.500086  |
|                  | Naringenin-7-O-glucoside                     | 0.355336  |
|                  | Chlorophyll a                                | 0.340397  |
|                  | $\alpha$ -carotene                           | 0.144425  |
|                  | Violaxanthin                                 | 0.0453084 |
|                  | Chlorophyll b                                | 0.0013707 |
|                  | Pelargonidin-3-O-(6-O-p-coumaroyl)-glucoside | 1.38234   |
|                  | Pelargonidin-3,5-O-diglucoside               | 1.35901   |
|                  | (E/Z)-phytoene                               | 1.34244   |

|              |                                          |           |
|--------------|------------------------------------------|-----------|
| S2 versus S3 | Quercetin-3-O-glucoside                  | 1.33094   |
|              | Peonidin-3-O-(6-O-p-coumaroyl)-glucoside | 1.32165   |
|              | Cyanidin-3-O-glucoside                   | 1.3213    |
|              | Cyanidin-3-O-rutinoside                  | 1.31642   |
|              | Rutin                                    | 1.27964   |
|              | Violaxanthin                             | 1.2198    |
|              | Pelargonidin-3-O-rutinoside              | 1.1651    |
|              | Cyanidin-3-O-rutinoside-5-O-glucoside    | 1.10875   |
|              | $\alpha$ -cryptoxanthin                  | 0.959553  |
|              | Chlorophyll a                            | 0.916769  |
|              | $\beta$ -carotene                        | 0.844567  |
|              | Lutein                                   | 0.824985  |
|              | Peonidin-3-O-rutinoside                  | 0.81488   |
|              | Antheraxanthin                           | 0.765519  |
|              | Naringenin-7-O-glucoside                 | 0.717858  |
|              | Kaempferol-3-O-rutinoside                | 0.71387   |
|              | $\alpha$ -carotene                       | 0.338488  |
|              | Chlorophyll b                            | 0.276746  |
|              | Neoxanthin                               | 0.251771  |
|              | Zeaxanthin                               | 0.198402  |
|              | $\beta$ -cryptoxanthin                   | 0.0627933 |
|              | Neoxanthin                               | 1.38131   |
|              | Lutein                                   | 1.34377   |
|              | Quercetin-3-O-glucoside                  | 1.28541   |
|              | Kaempferol-3-O-rutinoside                | 1.28047   |
|              | Violaxanthin                             | 1.2633    |
|              | Rutin                                    | 1.25784   |
|              | $\beta$ -carotene                        | 1.24668   |
|              | Cyanidin-3-O-rutinoside                  | 1.24081   |

|              |                                              |           |
|--------------|----------------------------------------------|-----------|
| S3 versus S4 | Naringenin-7-O-glucoside                     | 1.19032   |
|              | Cyanidin-3-O-glucoside                       | 1.14215   |
|              | Pelargonidin-3,5-O-diglucoside               | 1.13978   |
|              | Cyanidin-3-O-rutinoside-5-O-glucoside        | 1.09982   |
|              | Peonidin-3-O-(6-O-p-coumaroyl)-glucoside     | 1.08725   |
|              | Pelargonidin-3-O-rutinoside                  | 1.04516   |
|              | $\alpha$ -carotene                           | 0.970556  |
|              | Peonidin-3-O-rutinoside                      | 0.89554   |
|              | Chlorophyll b                                | 0.762674  |
|              | Chlorophyll a                                | 0.568639  |
|              | Pelargonidin-3-O-(6-O-p-coumaroyl)-glucoside | 0.549194  |
|              | Antheraxanthin                               | 0.430106  |
|              | $\beta$ -cryptoxanthin                       | 0.217246  |
|              | (E/Z)-phytoene                               | 0.174534  |
|              | Zeaxanthin                                   | 0.0502371 |
|              | $\alpha$ -cryptoxanthin                      | 0.0460157 |
| S4 versus S5 | $\alpha$ -carotene                           | 1.41456   |
|              | Peonidin-3-O-(6-O-p-coumaroyl)-glucoside     | 1.40816   |
|              | $\beta$ -cryptoxanthin                       | 1.39049   |
|              | Chlorophyll a                                | 1.37302   |
|              | Zeaxanthin                                   | 1.32089   |
|              | Naringenin-7-O-glucoside                     | 1.32011   |
|              | Neoxanthin                                   | 1.30758   |
|              | Pelargonidin-3-O-(6-O-p-coumaroyl)-glucoside | 1.27047   |
|              | Chlorophyll b                                | 1.21036   |
|              | Pelargonidin-3,5-O-diglucoside               | 1.19661   |
|              | Pelargonidin-3-O-rutinoside                  | 1.02826   |
|              | Peonidin-3-O-rutinoside                      | 0.954081  |
|              | Violaxanthin                                 | 0.941792  |
|              |                                              |           |
|              |                                              |           |

|              |                                          |           |
|--------------|------------------------------------------|-----------|
|              | Cyanidin-3-O-rutinoside                  | 0.892103  |
|              | Kaempferol-3-O-rutinoside                | 0.782584  |
|              | Cyanidin-3-O-rutinoside                  | 0.761305  |
|              | $\alpha$ -cryptoxanthin                  | 0.744628  |
|              | $\beta$ -carotene                        | 0.703201  |
|              | Cyanidin-3-O-rutinoside-5-O-glucoside    | 0.62163   |
|              | Antheraxanthin                           | 0.310042  |
|              | Rutin                                    | 0.23851   |
|              | Quercetin-3-O-glucoside                  | 0.232351  |
|              | Lutein                                   | 0.0640116 |
|              | (E/Z)-phytoene                           | 0.0187435 |
|              | $\alpha$ -carotene                       | 1.20715   |
|              | $\beta$ -carotene                        | 1.20128   |
|              | Peonidin-3-O-(6-O-p-coumaroyl)-glucoside | 1.19238   |
|              | Lutein                                   | 1.18641   |
|              | Violaxanthin                             | 1.17813   |
|              | $\beta$ -cryptoxanthin                   | 1.15651   |
|              | Neoxanthin                               | 1.14318   |
|              | Pelargonidin-3,5-O-diglucoside           | 1.13007   |
|              | Naringenin-7-O-glucoside                 | 1.12684   |
|              | Peonidin-3-O-rutinoside                  | 1.12414   |
| S5 versus S6 | $\alpha$ -cryptoxanthin                  | 1.12077   |
|              | Zeaxanthin                               | 1.1142    |
|              | Cyanidin-3-O-rutinoside-5-O-glucoside    | 1.10452   |
|              | Chlorophyll a                            | 1.07936   |
|              | Pelargonidin-3-O-rutinoside              | 1.09008   |
|              | Chlorophyll b                            | 1.05229   |
|              | Cyanidin-3-O-rutinoside                  | 0.849674  |
|              | Cyanidin-3-O-glucoside                   | 0.793319  |

---

|                                          |          |
|------------------------------------------|----------|
| Kaempferol-3-O-rutinoside                | 0.719707 |
| (E/Z)-phytoene                           | 0.678685 |
| Antheraxanthin                           | 0.629007 |
| Rutin                                    | 0.547248 |
| Quercetin-3-O-glucoside                  | 0.415757 |
| Peonidin-3-O-(6-O-p-coumaroyl)-glucoside | 0.110865 |

---

S1 : greyish brown, S2 : moderate brown, S3 : dark greenish yellow, S4 : strong yellow green, S5 : yellow green, S6 : moderate olive green.
