# Supplementary material for: Integrated Metabolome and Transcriptome Analyses Provide New Insights into the Leaf Color Changes in Osmanthus fragrans cv. ‘Wucaigui’
Source: MDPI journal article supplement (doi:10.3390/f15040709), 2024-04-17
Supplement: s1 [file s1]

**Table S2.** Primer sequences used for qRT-PCR.

| Number | Gene name         | Primer sequence                                        |
|--------|-------------------|--------------------------------------------------------|
| 1      | <i>OfSHOU4L1</i>  | F:ATTCCTCCAGTTCTTCCGACAA<br>R:GTAGACTCCAAAGGACCAGATGC  |
| 2      | <i>OfATL1B</i>    | F:GTAGACTCCAAAGGACCAGATGC<br>R:CGAAAATGCACCCGGAGA      |
| 3      | <i>OfGABA-TP1</i> | F:AGGGGCACGATATGTTGGC<br>R:GGTTCAAGTCCGTCGTCTGC        |
| 4      | <i>OfUGE5</i>     | F:GGTTCAAGTCCGTCGTCTGC<br>R:CATCCATGTGCAGCCATAACTT     |
| 5      | <i>OfANS1</i>     | F:TTTCAGCTTCCAATGACCGAG<br>R:TTGCCGTATCCATCAAATTCAC    |
| 6      | <i>OfPPR1</i>     | F:CAAAGCTCTACGCAAGTTAAAAGG<br>R:GGATTGATGAACCGCCCTC    |
| 7      | <i>OfUBC32</i>    | F:CCAGCGGTGAAGAGGATTTT<br>R:CTTGGGGTCCCCTTATAGCA       |
| 8      | <i>OfEIF1AX</i>   | F:GCACAAGAATCAAACCCAACAA<br>R:GTGGGCCTGTCTTCACGAAT     |
| 9      | <i>OfUGE3</i>     | F:CCTGGTGATGCTGAGGTTGTAT<br>R:GGCTTTCTCCGTTGATGCA      |
| 10     | <i>OfSGF29A</i>   | F:ATACCATTTCTTAAGCGGACAGA<br>R:TTACGAGCTTGGACTACAGTTGC |
| 11     | <i>OfCCD1</i>     | F:CAAATCCCAGAAAAGGTGTCTG<br>R:AGCCCATTCCAACCAGTCC      |
| 12     | <i>OfRAN</i>      | F:AGAACCGACAGGTGAAGGCAA<br>R:TGGCAAGGTACAGAAAGGGCT     |
